# Supplementary material
Source: PubMed Central journal article supplement (PMC1861244)
Supplement: heart_hrt.2006.092346_1.pdf [file heart_hrt.2006.092346_1.pdf]

**Table 1** Using prevalence data to predict CHD and CVD risk in subpopulations in which the observed rate is known

J

| CHD                                                              | Caerphilly             |            |              |            | Brit  |
|------------------------------------------------------------------|------------------------|------------|--------------|------------|-------|
|                                                                  | Socioeconomic position |            | Height (cm)  |            | Bod   |
|                                                                  | Manual                 | Non-manual | ≤170 cm      | >170       | >27   |
| Number                                                           | 1668 (68%)             | 777 (32%)  | 1071 (43%)   | 1401 (57%) | 2224  |
| Prevalent CHD* at baseline                                       | 6.29%                  | 4.12%      | 6.54%        | 5.50%      | 4.81% |
| PR                                                               | 1.53                   | –          | 1.19         | –          | 1.46  |
| 10-year CHD incidence at means of risk factors in low risk group | –                      | 5.85%      | –            | 7.65%      | –     |
| IR multiplicative factor (IR[HIGH]=PR×IR[LOW])                   | 8.95                   | –          | 9.10         | –          | 7.40  |
| Mean predicted 10-year risk of CHD                               | 8.53                   | –          | 8.89         | –          | 7.08  |
| Observed 10-year CHD incidence                                   | 7.55                   | –          | 9.52         | –          | 6.95  |
| Error (%)                                                        | 0.98 (13.0%)           | –          | –0.63 (6.6%) | –          | –0.1  |
| <b>CVD</b>                                                       |                        |            |              |            |       |
| Number                                                           | 1668 (68%)             | 777 (32%)  | 1071 (43%)   | 1401 (57%) | 2224  |
| Prevalent CVD‡ at baseline                                       | 7.19%                  | 5.28%      | 7.66%        | 6.50%      | 5.17% |
| PR                                                               | 1.36                   | –          | 1.18         | –          | 1.34  |
| 10-year CVD incidence at means of risk factors in low risk group | –                      | 6.67%      | –            | 8.21%      | –     |
| IR multiplicative factor                                         | 9.08                   | –          | 9.69         | –          | 8.62  |

| CHD                                | Caerphilly             |            |              |      | Brit |
|------------------------------------|------------------------|------------|--------------|------|------|
|                                    | Socioeconomic position |            | Height (cm)  |      | Bod  |
|                                    | Manual                 | Non-manual | ≤170 cm      | >170 | >27  |
| (IR[HIGH]=PR×IR[LOW])              |                        |            |              |      |      |
| Mean predicted 10-year risk of CVD | 8.59                   | –          | 10.64        | –    | 8.28 |
| Observed 10-year CVD incidence     | 9.94                   | –          | 9.53         | –    | 8.45 |
| Error (%)                          | –1.35 (13.6%)          | –          | 1.11 (11.6%) | –    | –0.1 |

\*Other is north England, Midlands, Wales and Scotland.

†Prevalent coronary heart disease (CHD) defined as a history of myocardial infarction.

‡Prevalent cardiovascular disease (CVD) defined as a history of myocardial infarction or stroke.

HIGH, high risk; IR, incidence rate; LOW, low risk; PR, prevalence ratio.
